# Supplementary material for: Direct wavefront sensing for high-resolution in vivo imaging in scattering tissue
Source: PubMed Central journal article supplement (PMC4490402; doi:10.1038/ncomms8276), 2015-06-15
Supplement: ncomms8276-s1.pdf [file ncomms8276-s1.pdf]

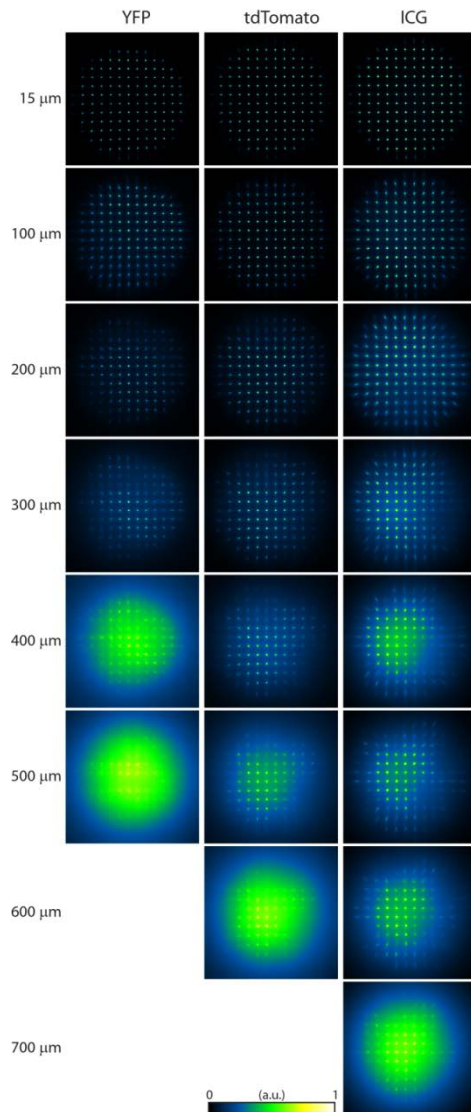

**Supplementary Figure 1 | Guide stars of progressively longer wavelengths can be used for direct wavefront sensing at increasingly large depth in the cortex of the living mouse.** Typical SH images of guide stars obtained at different depths by TPE of: YFP in sparsely labeled L5 pyramidal neurons (left column); tdTomato in densely labeled cortical neurons (middle column); and the directly injected ICG (right column) in the cortex of a living mouse.

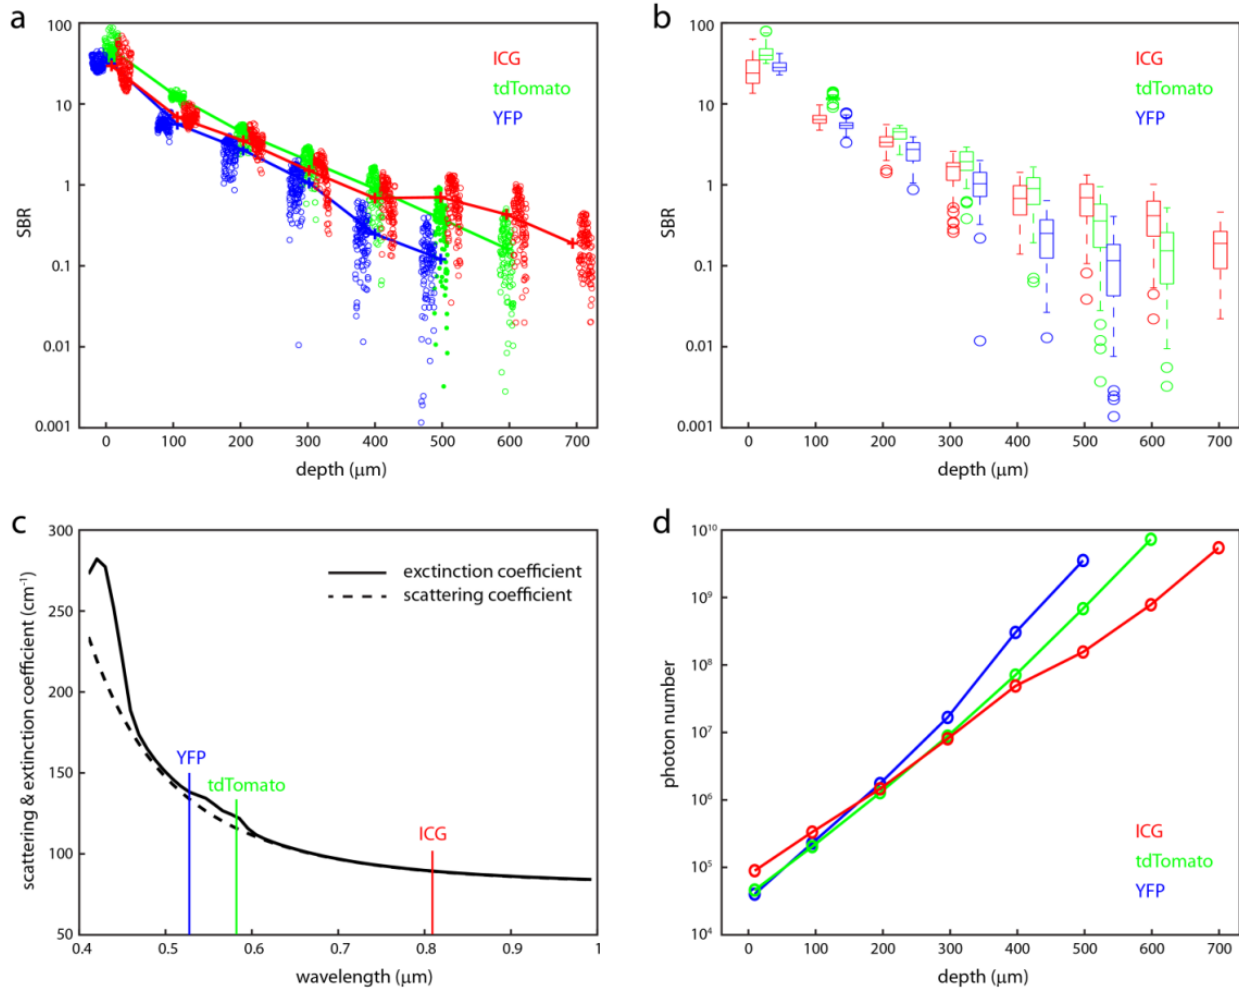

**Supplementary Figure 2 | Performance comparison of guide stars generated by TPE of YFP, tdTomato or ICG in the cortex of a living mouse. (a)** Signal-to-background ratio (SBR) of guide-star images on the SH sensor (**Supplementary Figure 1**) generated by TPE of YFP, tdTomato, or ICG at different depths in the cortex of the living mouse. Each circle is the SBR of the guide-star image formed by a single lenslet. The averages of each data set at different depths are connected by solid lines. **(b)** Data in (a) represented as box-and-whisker plots (circles indicate outliers). **(c)** Scattering and extinction coefficients of the live mouse cortex at different wavelengths<sup>1</sup>. **(d)** The total number of fluorescence photons emitted within the cortex from the guide star that is required for an average spot localization precision of 1/5 pixel size on the SH sensor (1 pixel size equals 1.07  $\mu\text{m}$  at sample plane). The calculation was done for a NA 1.1 objective using the extinction coefficients in (c). The localization precision is estimated based on the theory by Thompson, et al<sup>2</sup>.

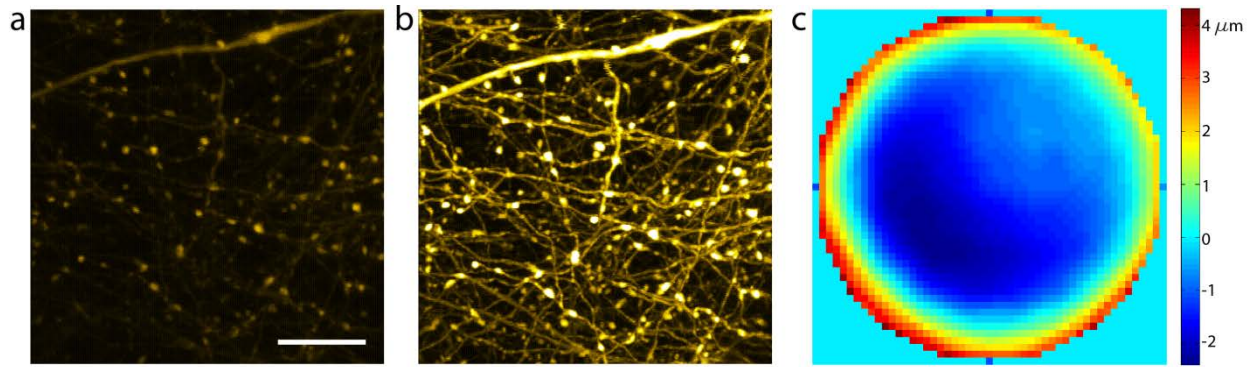

**Supplementary Figure 3| Correction of cranial-window-induced aberration. (a-b)** *In vivo* TPE fluorescence images of axons and dendrites at 15  $\mu\text{m}$  depth in the cortex of a Thy1-YFP mouse as acquired **(a)** without AO and **(b)** with AO corrections. The objective correction ring was adjusted to optimize imaging in water (i.e., without any correction for the cranial window aberration). Scale bar is 20  $\mu\text{m}$ . **(c)** Corrective wavefront for the cranial-window-induced aberration.

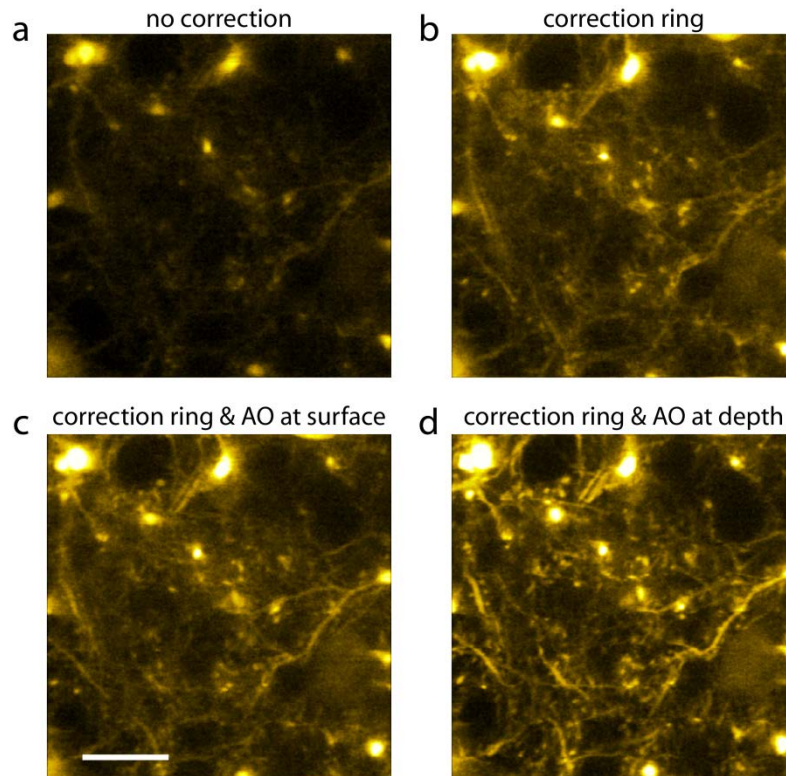

**Supplementary Figure 4 | Image comparison with different correction schemes.** Comparative in vivo TPE fluorescence images of the same field of neurons 500  $\mu\text{m}$  deep in the cortex of a Thy1-YFP mouse as acquired with: **(a)** the objective correction ring optimized for imaging in water, and no AO used; **(b)** the objective correction ring optimized for imaging into water through a 170  $\mu\text{m}$  thick cranial window, and no AO used; **(c)** same as (b), except with additional AO correction carried out on the surface of the cortex to correct any residual aberrations at that position; **(d)** same as (b), except with additional AO correction carried out at the 500  $\mu\text{m}$  depth where the images were taken. Scale bar is 20  $\mu\text{m}$ .

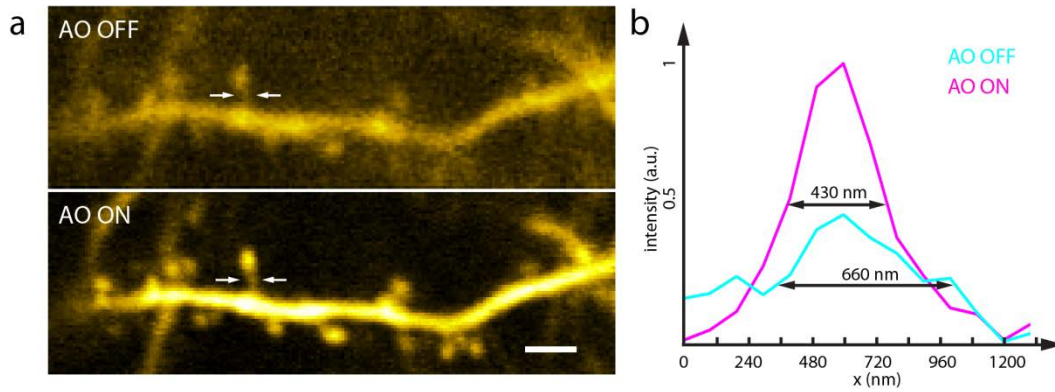

**Supplementary Figure 5 | Resolution enhancement after AO correction. (a)** Single-plane TPE fluorescence images of a dendritic branch at 550  $\mu\text{m}$  below pia in a Thy1-YFPH mouse before (with only correction ring) and after AO correction. Scale bar is 2  $\mu\text{m}$ . **(b)** Line intensity profiles of the feature (the neck of a dendritic spine) indicated by arrows in (a). Image of the spine neck after AO correction has a full width at half maximum of 430 nm.

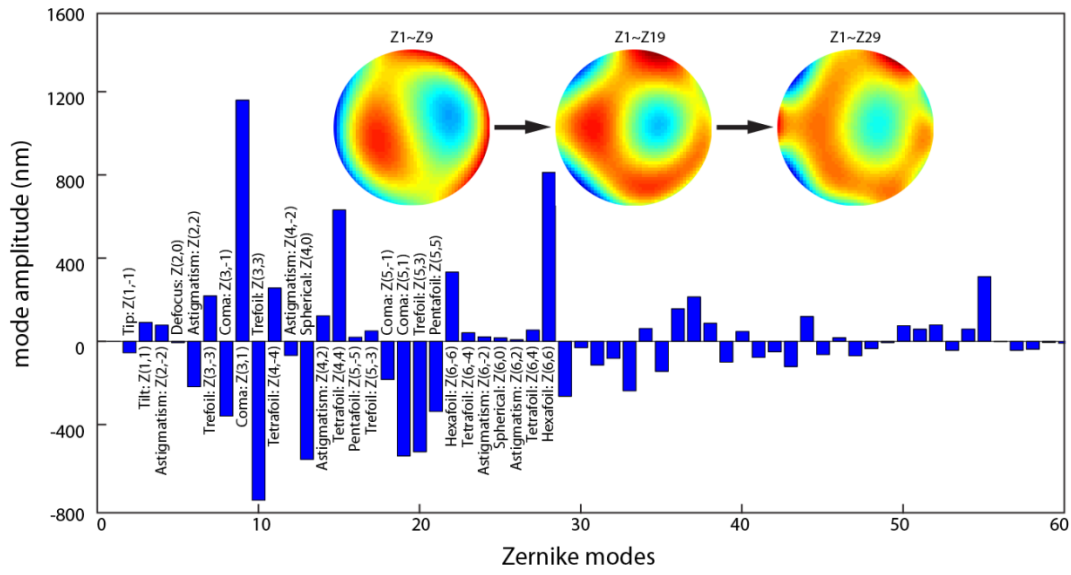

**Supplementary Figure 6 | Zernike modes for the corrective wavefront of Fig. 1c, measured at 600  $\mu\text{m}$  depth in the mouse cortex.** Amplitudes of Zernike modes in a modal decomposition of the wavefront. Inset shows the wavefront as calculated from the first 9, 19, or 29 modes, respectively.

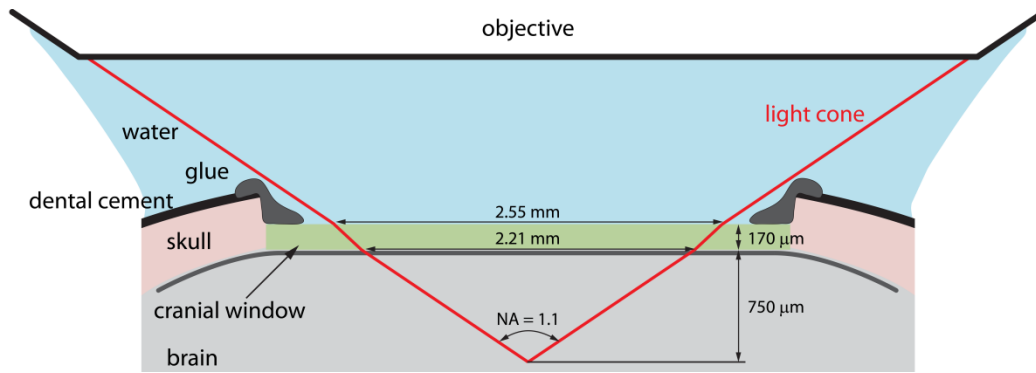

**Supplementary Figure 7 | Required cranial window diameter for imaging 750μm below pia with a 1.1 NA objective.**

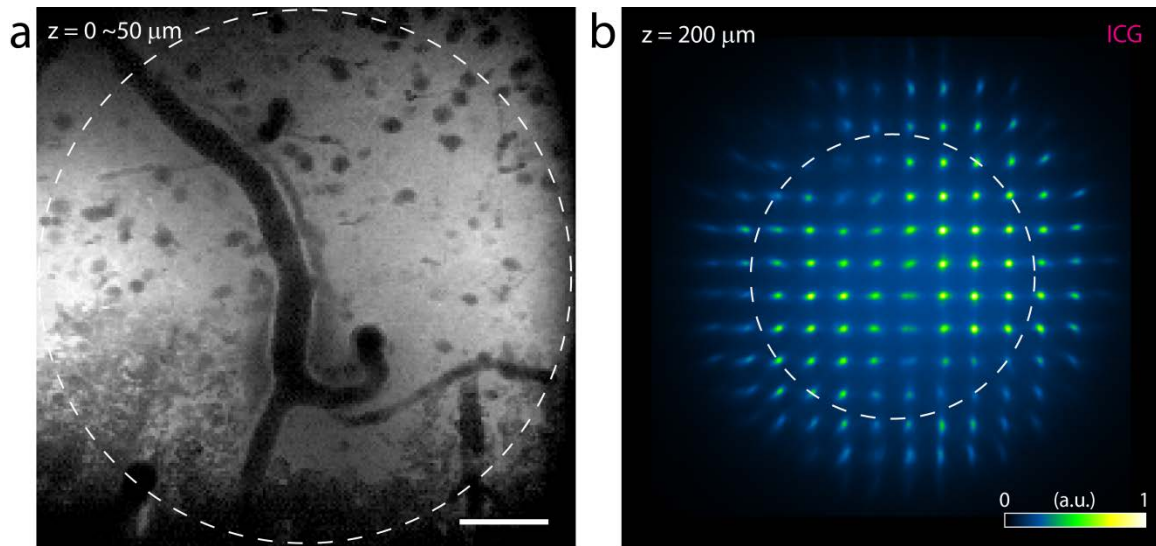

**Supplementary Figure 8 | Effects of hemoglobin absorption on direct wavefront sensing *in vivo*.** (a) Blood (black) absorbs visible fluorescence, but (b) transmits NIR ICG fluorescence for wavefront sensing. The dashed circle in (a) corresponds to that in (b). Scale bar is  $50 \mu\text{m}$ .



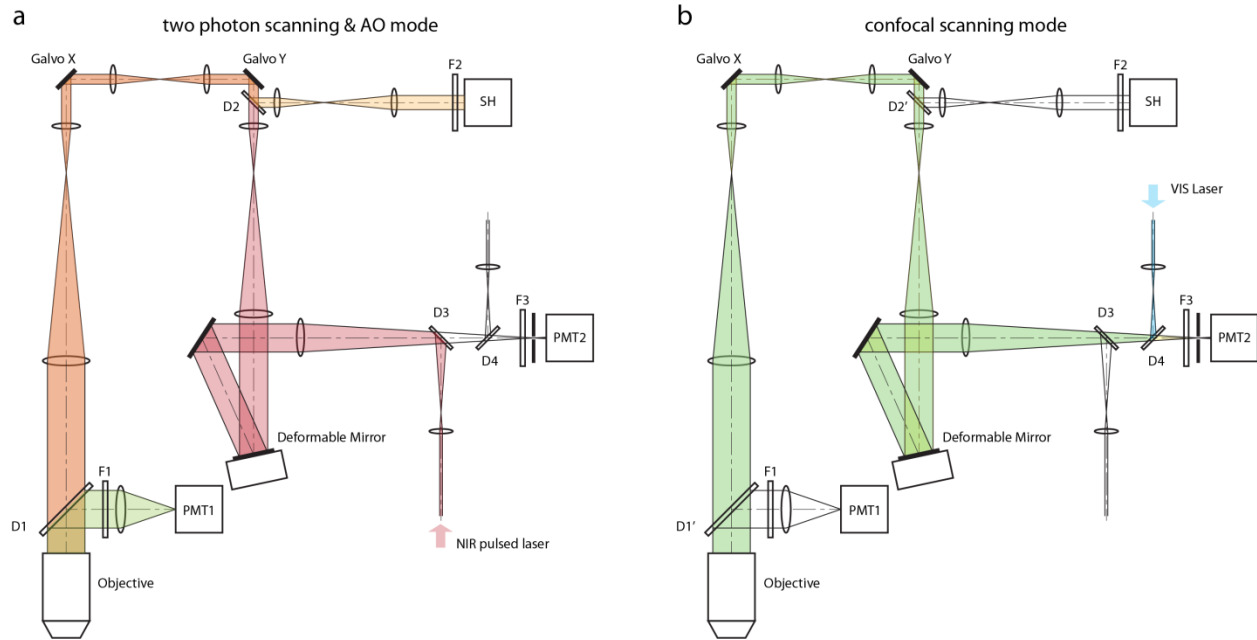

**Supplementary Figure 9 | Experimental schematics. (a) Two photon scanning & AO mode:** Near-infrared (NIR) pulsed excitation (red) is directed into the system by dichroic mirror D3, reflected off a deformable mirror, and scanned by a pair of galvanometer mirrors (Galvo X and Y) before entering the rear pupil of a 1.1 NA water-dipping objective. The deformable mirror, Galvos X and Y, and the objective rear pupil are all mutually conjugate, so that the phase pattern from the deformable mirror is stationary at the rear pupil even while scanning. The emitted visible signal fluorescence is collected by the objective, reflected from dichroic mirror D1, and focused onto a photomultiplier tube PMT1. The NIR fluorescence from the TPE guide star (orange) is descanned by the galvos, separated from the NIR excitation by dichroic beamsplitter D2, and then sent to a Shack-Hartmann (SH) sensor to determine the aberrated wavefront of the emission. **(b) Confocal scanning mode:** visible excitation light (blue) is reflected by dichroic mirror D4 and follows the same light path as NIR excitation to the objective. The emission retraces the excitation path, except that it transmits through dichroic mirror D4 and enters another photomultiplier tube PMT2 after going through a pinhole that is conjugated to the objective focus.

**Supplementary Table 1 | Acquisition parameters for images in the main text.**

| Image property                                                 | Figure 1a and b                                   | Figure 2                                                                                                              | Figure 3a                            |
|----------------------------------------------------------------|---------------------------------------------------|-----------------------------------------------------------------------------------------------------------------------|--------------------------------------|
| Modality                                                       | two photon                                        | two photon                                                                                                            | two photon                           |
| Sample                                                         | B6.Cg-Tg(Thy1-YFPH)2Jrs/J                         | B6.Cg-Tg(Thy1-YFPH)2Jrs/J                                                                                             | C57BL/6J-Tg(Thy1-GCaMP6s)GP4.3Dkim/J |
| Fluorescent label                                              | YFP (cytosolic)                                   | YFP (cytosolic)                                                                                                       | GCaMP6s (cytosolic)                  |
| Excitation wavelength (nm)                                     | 960                                               | 960                                                                                                                   | 920                                  |
| Excitation power post objective (mW)                           | 56                                                | 16                                                                                                                    | 60                                   |
| Voxel volume (nm <sup>3</sup> )/ Pixel size (nm <sup>2</sup> ) | 200x200x500                                       | 200x200x500                                                                                                           | 250x250                              |
| Image volume (μm <sup>3</sup> ) / field (μm <sup>2</sup> )     | 120x120x20                                        | 80x80x20                                                                                                              | 75x50                                |
| Pixel rate (pixels/s)                                          | 80k                                               | 80k                                                                                                                   | 120k                                 |
| Fluorophore for AO                                             | ICG                                               | Directly injected ICG                                                                                                 | iRFP                                 |
| AO correction excitation wavelength (nm)                       | 1020                                              | 1020                                                                                                                  | 920                                  |
| AO correction excitation power (mW)                            | 40                                                | 16                                                                                                                    | 100                                  |
| AO integration time (s)                                        | 2                                                 | 2                                                                                                                     | 2                                    |
| AO correction field of view (μm <sup>2</sup> )                 | 60x60                                             | 60x60                                                                                                                 | 60x60                                |
| additional comments                                            | Gaussian blur with sigma of 1 (ImageJ) is applied | The image is the maximum intensity projection of imaging volume and Gaussian blur with sigma of 1 (ImageJ) is applied | none                                 |

**Supplementary Table 1 (cont'd) | Acquisition parameters for images in the main text.**

| <b>Image property</b>                                      | <b>Figure 3b</b>                     | <b>Figure 4a</b>                        | <b>Figure 4b</b>                                                                                                          |
|------------------------------------------------------------|--------------------------------------|-----------------------------------------|---------------------------------------------------------------------------------------------------------------------------|
| Modality                                                   | two photon                           | confocal                                | confocal                                                                                                                  |
| Sample                                                     | C57BL/6J-Tg(Thy1-GCaMP6s)GP4.3Dkim/J | B6.Cg-Tg(Thy1-COP4/EYFP)18Gfng/J        | B6.Cg-Tg(Thy1-YFP)2Jrs/J                                                                                                  |
| Fluorescent label                                          | GCaMP6s (cytosolic)                  | YFP (membrane-expressed, fused to ChR2) | YFP (cytosolic)                                                                                                           |
| Excitation wavelength (nm)                                 | 920                                  | 488                                     | 488                                                                                                                       |
| Excitation power (mW)                                      | 100                                  | 0.05                                    | 0.01                                                                                                                      |
| Voxel volume (nm <sup>3</sup> )                            | 250x250                              | 80x80                                   | 80x80x270                                                                                                                 |
| Image volume (μm <sup>3</sup> ) / field (μm <sup>2</sup> ) | 75x50                                | 24x32                                   | 32x23                                                                                                                     |
| Pixel rate (pixels/s)                                      | 120k                                 | 80k                                     | 80k                                                                                                                       |
| Fluorophore for AO                                         | iRFP                                 | YFP                                     | YFP                                                                                                                       |
| AO correction excitation wavelength (nm)                   | 920                                  | 960                                     | 960                                                                                                                       |
| AO correction excitation power (mW)                        | 120                                  | 2                                       | 2                                                                                                                         |
| AO integration time (s)                                    | 2                                    | 0.4                                     | 0.1                                                                                                                       |
| AO correction field of view (μm <sup>2</sup> )             | 60x60                                | 40x40                                   | 40x40                                                                                                                     |
| additional comments                                        | none                                 | none                                    | Maximum intensity projection of three selected planes from the imaging volume. It's associated with Supplementary Movie 7 |

**Supplementary Table 2 | Acquisition parameters for supplementary figure 1.**

| Image property                                        |                   | Figure 1<br>Left column   | Figure 1<br>Middle column | Figure 1<br>Right column |
|-------------------------------------------------------|-------------------|---------------------------|---------------------------|--------------------------|
| Sample                                                |                   | B6.Cg-Tg(Thy1-YFPH)2Jrs/J | NPY(65)-Cre X Ai9         | Wild type                |
| Fluorescent label                                     |                   | YFP (cytosolic)           | tdTomato (cytosolic)      | Directly injected ICG    |
| AO correction excitation wavelength (nm)              |                   | 960                       | 1020                      | 1020                     |
| AO integration time (s)                               |                   | 40                        | 40                        | 20                       |
| AO correction excitation power<br>post objective (mW) | 15 $\mu\text{m}$  | 6                         | 3                         | 1                        |
|                                                       | 100 $\mu\text{m}$ | 22                        | 7                         | 12                       |
|                                                       | 200 $\mu\text{m}$ | 52                        | 12                        | 27                       |
|                                                       | 300 $\mu\text{m}$ | 86                        | 27                        | 45                       |
|                                                       | 400 $\mu\text{m}$ | 117                       | 45                        | 62                       |
|                                                       | 500 $\mu\text{m}$ | 133                       | 62                        | 76                       |
|                                                       | 600 $\mu\text{m}$ | -                         | 87                        | 87                       |
|                                                       | 700 $\mu\text{m}$ | -                         | -                         | 87                       |

**Supplementary Table 3 | Acquisition parameters for images in supplementary figures.**

| Image property                                                  | Figure 3                                            | Figure 4                               | Figure 5                                             |
|-----------------------------------------------------------------|-----------------------------------------------------|----------------------------------------|------------------------------------------------------|
| Modality                                                        | two photon                                          | two photon                             | two photon                                           |
| Sample                                                          | B6.Cg-Tg(Thy1-YFPH)2Jrs/J                           | B6.Cg-Tg(Thy1-YFPH)2Jrs/J              | B6.Cg-Tg(Thy1-YFPH)2Jrs/J                            |
| Fluorescent label                                               | YFP (cytosolic)                                     | YFP (cytosolic)                        | YFP (cytosolic)                                      |
| Excitation wavelength (nm)                                      | 960                                                 | 960                                    | 960                                                  |
| Excitation power post objective (mW)                            | 4                                                   | 56                                     | 60                                                   |
| Voxel volume (nm <sup>3</sup> ) / Pixel size (nm <sup>2</sup> ) | 200x200x500                                         | 200x200                                | 120x120                                              |
| Image volume (μm <sup>3</sup> ) / field (μm <sup>2</sup> )      | 80x80x15                                            | 80x80                                  | 24x12                                                |
| Pixel rate (pixels/s)                                           | 80k                                                 | 80k                                    | 120k                                                 |
| Fluorophore for AO                                              | Directly injected ICG                               | Directly injected ICG                  | Directly injected ICG                                |
| AO correction excitation wavelength (nm)                        | 960                                                 | 1020                                   | 1020                                                 |
| AO correction excitation power (mW)                             | 2                                                   | 2 (surface)<br>40 (depth of 500 μm)    | 60                                                   |
| AO integration time (s)                                         | 1                                                   | 0.2 (surface)<br>2 (depth of 500 μm)   | 2                                                    |
| AO correction field of view (μm <sup>2</sup> )                  | 40x40                                               | 60x60                                  | 60x60                                                |
| additional comments                                             | Maximum intensity projection of the imaging volume. | Gaussian blur with sigma of 1 (ImageJ) | The image is the average of 5 frames to increase SNR |

**Supplementary Table 4 | Acquisition parameters for images in supplementary movies.**

| <b>Image property</b>                                          | <b>Movie 1</b>            | <b>Movie 2</b>            | <b>Movie 3</b>                       |
|----------------------------------------------------------------|---------------------------|---------------------------|--------------------------------------|
| Modality                                                       | two photon                | two photon                | two photon                           |
| Sample                                                         | B6.Cg-Tg(Thy1-YFPH)2Jrs/J | B6.Cg-Tg(Thy1-YFPH)2Jrs/J | C57BL/6J-Tg(Thy1-GCaMP6s)GP4.3Dkim/J |
| Fluorescent label                                              | YFP (cytosolic)           | YFP (cytosolic)           | GCaMP6s (cytosolic)                  |
| Excitation wavelength (nm)                                     | 960                       | 960                       | 920                                  |
| Excitation power (mW)                                          | 56                        | 87                        | 90                                   |
| Voxel volume (nm <sup>3</sup> )/ Pixel size (nm <sup>2</sup> ) | 200x200x500               | 200x200x500               | 400x400                              |
| Image volume (μm <sup>3</sup> ) / field (μm <sup>2</sup> )     | 80x80x20                  | 80x80x15                  | 100x100                              |
| Pixel rate (pixels/s)                                          | 80k                       | 40k                       | 125k                                 |
| Fluorophore for AO                                             | Directly injected ICG     | Directly injected ICG     | Directly injected ICG                |
| AO correction excitation wavelength (nm)                       | 1020                      | N.A.                      | 1020                                 |
| AO correction excitation power (mW)                            | 70                        | N.A.                      | 40                                   |
| AO integration time (s)                                        | 4                         | N.A.                      | 10                                   |
| AO correction field of view (μm <sup>2</sup> )                 | 60x60                     | N.A.                      | 60x60                                |
| additional comments                                            | none                      | none                      | none                                 |

**Supplementary Table 4 (cont'd 1) | Acquisition parameters for images in supplementary movies.**

| <b>Image property</b>                                          | <b>Movie 4</b>                       | <b>Movie 5</b>                       | <b>Movie 6</b>                       |
|----------------------------------------------------------------|--------------------------------------|--------------------------------------|--------------------------------------|
| Modality                                                       | two photon                           | two photon                           | two photon                           |
| Sample                                                         | C57BL/6J-Tg(Thy1-GCaMP6s)GP4.3Dkim/J | C57BL/6J-Tg(Thy1-GCaMP6s)GP4.3Dkim/J | C57BL/6J-Tg(Thy1-GCaMP6s)GP4.3Dkim/J |
| Fluorescent label                                              | GCaMP6s (cytosolic)                  | GCaMP6s (cytosolic)                  | GCaMP6s (cytosolic)                  |
| Excitation wavelength (nm)                                     | 920                                  | 920                                  | 920                                  |
| Excitation power (mW)                                          | 60                                   | 100                                  | 140                                  |
| Voxel volume (nm <sup>3</sup> )/ Pixel size (nm <sup>2</sup> ) | 250x250                              | 250x250                              | 250x250                              |
| Image volume (μm <sup>3</sup> ) / field (μm <sup>2</sup> )     | 75x50                                | 75x50                                | 75x50                                |
| Pixel rate (pixels/s)                                          | 120k                                 | 120k                                 | 120k                                 |
| Fluorophore for AO                                             | iRFP                                 | iRFP                                 | N.A.                                 |
| AO correction excitation wavelength (nm)                       | 920                                  | 920                                  | N.A.                                 |
| AO correction excitation power (mW)                            | 100                                  | 120                                  | N.A.                                 |
| AO integration time (s)                                        | 2                                    | 2                                    | N.A.                                 |
| AO correction field of view (μm <sup>2</sup> )                 | 60x60                                | 60x60                                | N.A.                                 |
| additional comments                                            | none                                 | none                                 | none                                 |

**Supplementary Table 4 (cont'd 2) | Acquisition parameters for images in supplementary movies.**

| <b>Image property</b>                                          | <b>Movie 7</b>                                     |
|----------------------------------------------------------------|----------------------------------------------------|
| Modality                                                       | confocal                                           |
| Sample                                                         | B6.Cg-Tg(Thy1-YFPH)2Jrs/J                          |
| Fluorescent label                                              | YFP (cytosolic)                                    |
| Excitation wavelength (nm)                                     | 488                                                |
| Excitation power (mW)                                          | from 0.01 to 0.1 with increasing depth             |
| Voxel volume (nm <sup>3</sup> )/ Pixel size (nm <sup>2</sup> ) | 80x80x270                                          |
| Image volume (μm <sup>3</sup> ) / field (μm <sup>2</sup> )     | 32x32x86.4                                         |
| Pixel rate (pixels/s)                                          | 80k                                                |
| Fluorophore for AO                                             | YFP                                                |
| AO correction excitation wavelength (nm)                       | 960                                                |
| AO correction excitation power (mW)                            | 2                                                  |
| AO integration time (s)                                        | 0.1                                                |
| AO correction field of view (μm <sup>2</sup> )                 | 40x40                                              |
| additional comments                                            | Images at different depth are intensity-normalized |



### Supplementary References:

1. Jacques, S.L. Optical properties of biological tissues: a review. *Phys Med Biol* **58**, R37-61 (2013).
2. Thompson, R.E., Larson, D.R. & Webb, W.W. Precise nanometer localization analysis for individual fluorescent probes. *Biophys J* **82**, 2775-2783 (2002).
